WITHDRAWN ARTICLE

WITHDRAWN: LncRNA TUG1 knockdown mitigates inflammatory injury induced by cigarette smoke extract in chronic obstructive pulmonary disease via miR-34c/BRD4 axis

Beibei Song; Siyu Wu; Liyun Ye; Zeng Jing; Jing Cao

*Biosci Rep* (2020) BSR20193896; **DOI:** 10.1042/BSR20193896

The Accepted Manuscript version of this article (published on 19 August 2020) was withdrawn on 3 December 2020 due to concerns over data validity.
